32

### 33 **Introduction**

34 Strawberry (*Fragaria ×ananassa* Duch.) is a crop of high socio-economic value worldwide due to  
35 its organoleptic properties, contents of vitamins, minerals, and bioactive compounds such as  
36 antioxidants (Fierascu et al., 2020). Strawberry has high water requirements (Klamkowski and  
37 Treder, 2006; García-Tejero et al., 2018) and is highly susceptible to water deficit during crop  
38 establishment (El-Farhan and Pritts, 1997, Grant et al., 2012), which impacts plant growth, yield,  
39 and fruit quality (Liu et al., 2007).

40 In recent years, climate change has increased the frequency and intensity of drought periods  
41 worldwide (OECD 2014; Leng and Hall, 2019). Water availability is projected to decrease and  
42 global water demand to increase (OECD 2014; Mo et al. 2017), which will potentially cause  
43 unforeseen stress conditions in unprotected and even protected crops.

44 Plants exhibit numerous physiological, morphological, biochemical, and molecular mechanisms to  
45 cope with water deficit (Farooq et al., 2009; Ahuja et al., 2010) with variable effects on plant  
46 growth. Stomatal closure, mediated by abscisic acid, is one of the first responses to low water  
47 availability (Osakabe et al., 2014; Martin-StPaul et al., 2017) since it limits leaf transpiration;  
48 however, it also reduces CO<sub>2</sub> uptake and, therefore, diminishes photoassimilate production and  
49 plant growth (Galmés et al., 2013). In strawberry plants, reduced stomatal conductance,  
50 accompanied by significantly lower photosynthetic rates, has been reported as a typical response  
51 to drought (Martínez-Ferri et al., 2016).

52 As water stress increases, reactive oxygen species (ROS) are produced and may cause damage to  
53 proteins, nucleic acids, lipids, and chlorophylls (Munné-Bosch and Peñuelas, 2004). ROS  
54 accumulation causes lipid peroxidation in membranes and damages in plant photosystem II (PSII;  
55 Duan et al., 2013). In strawberry, water stress has resulted in excessive generation of ROS, which  
56 increases membrane permeability and reduces PSII photochemical efficiency,  $F_v/F_m$  (Gulen et al.,  
57 2018). Consequently, reduced photosynthetic rates slow down plant growth, change the pattern of  
58 assimilate distribution (Martínez-Ferri et al., 2016), and affects the number of leaves, leaf  
59 expansion rate, total plant biomass, and yield (Blanke and Cooke, 2004; Grant et al., 2012).  
60 Depending on the cultivar, reductions between 25-37% in plant growth have been reported  
61 (Klamkowski and Treder, 2008), and decreases of 33% in yield and 17% in fruit size have been  
62 recorded (El-Farhan and Pritts, 1997).

63 Most herbaceous species, including strawberry, do not have efficient mechanisms to mitigate the  
64 effects of water deficit (Martínez-Ferri et al., 2016). Therefore, it is paramount to evaluate  
65 strategies aimed to improve plant performance under water-limited conditions (Ghaderi et al.,  
66 2015). The use of shading nets in environments of high light intensity and low water availability  
67 might be an effective and inexpensive technique to alleviate water deficit in strawberry (Ahemd et  
68 al., 2016). Shading has been successfully applied in many crop species including young peach  
69 (*Prunus armeniaca*) (Nicolás et al., 2005), kiwi (*Actinidia deliciosa*) (Montanaro et al., 2009), and  
70 olive (*Olea europaea*) (Sofó et al., 2009) to mitigate the effects of drought stress, and has become  
71 a common practice to improve fruit quality and plant physiology in subtropical fruits (Mditshwa et  
72 al., 2019). Likewise, in strawberry, shading nets are increasingly used, even over plastic tunnels,  
73 to protect plants and fruits from excessive sunlight (Neri et al. 2012). The positive effect of shading  
74 on plant water status and physiology is attributed to reduced intensity of incident light and changes  
75 in microclimatic variables such as air temperature, relative humidity, and vapor pressure deficit  
76 (Jifon and Syvertsen, 2003; Mditshwa et al., 2019).

77 In strawberry, the effects of water stress, and shading on physiological and yield responses have  
78 been independently studied (Tabatabaei et al., 2008; Casierra-Posada et al., 2012; Klamkowski et  
79 al., 2015). However, to our knowledge, there are not reports on the joint evaluation of the effects  
80 of water deficit and shading on strawberry physiology. The objective of this research was to  
81 evaluate the effect of shading on the vegetative growth of strawberry under water deficit, as a  
82 potential strategy to mitigate water shortage effects on this crop.

83

## 84 **Materials and Methods**

### 85 ***Plant Material and Growth Conditions***

86 The study was carried out under greenhouse conditions at the Faculty of Agricultural Sciences,  
87 Universidad Nacional de Colombia, Bogotá (Colombia) located at 2640 m a.s.l. Stolons of the  
88 neutral day strawberry (*Fragaria ×ananassa*) cv. Sweet Ann (Planasa, USA) with roots and crowns  
89 of 12 and 2 cm length, respectively, were planted in 3 L plastic pots (one stolon per pot) containing  
90 a mixture of soil, blond peat, and burnt rice husk (16:1:1 w/w/w). According to the physicochemical  
91 analysis of substrate (Table S1), and nutrient requirements of strawberry (Tagliavini et al., 2005),  
92 the plants were fertilized once a week with 320 mL of a nutrient solution composed of 0.42 g L<sup>-1</sup>  
93 KNO<sub>3</sub>, 0.86 g L<sup>-1</sup> Ca(NO<sub>3</sub>)<sub>2</sub>, 0.12 g L<sup>-1</sup> NH<sub>4</sub>H<sub>2</sub>PO<sub>4</sub>, and micronutrients (Fe, B, Mn, Zn, and Cu).

94 Fertilizer was distributed to avoid altering the water status of the plants according to the treatments.  
95 S and Mg were not included as part of the fertilization, due to their initial contents in the substrate  
96 (Table S1). All plants were watered maintaining the substrate water capacity (SWC) from planting  
97 until the start of the treatments. To avoid early flower development, flower buds were removed  
98 from the plants during the experiment.  
99 Air temperature and relative air humidity were recorded with a VP-3 sensor (Decagon Devices  
100 Inc., USA) and Photosynthetically Active Radiation (PAR) was registered with PAR sensor  
101 (Vernier, USA) positioned 30 cm above the plants (Table S2); the sensors were coupled to Data  
102 Logger Decagon EM50 (Decagon Devices Inc., USA).

103

#### 104 ***Treatments***

105 From planting, the experiment took 74 days and when plants had 3-4 expanded leaves (50 days  
106 after planting), the treatments were established in a  $2 \times 2$  factorial design. Treatments consisted of  
107 the combination of two levels of shading and two levels of water availability: i) shading (S) with a  
108 47% reduction in incident light (maximum and minimum diurnal PAR of 251.70 and 21.35  $\mu\text{mol}$   
109  $\text{m}^{-2} \text{s}^{-1}$ , respectively) or non-shaded (NS) conditions (maximum and minimum diurnal PAR of  
110 476.07 and 40.28  $\mu\text{mol} \text{m}^{-2} \text{s}^{-1}$ , respectively) and ii) water deficit (WD) or well-watered (WW)  
111 plants. The combination of the factors resulted in four treatments: NS-WW, NS-WD, S-WW, and  
112 S-WD, and each treatment had four replicates consisting of one plant. The shading was provided  
113 with a commercially available polyethylene black net referred with a shading percentage of 33%  
114 and a weight of 31 g  $\cdot \text{m}^{-2}$ , placed 1.5 m above plants. Under shading, the average relative air  
115 humidity (RH) was 62% and the average air temperature (T) corresponded to 21 °C, while non-  
116 shaded conditions had 59% of RH and a T of 26 °C.

117 Based on the substrate moisture, the WW plants were maintained at a capacity of 100% Volumetric  
118 Water Content (VWC). For WD treatments, it has been reported in strawberry cultivars and wild  
119 strawberry (*Fragaria virginiana*) that water deficit during 7–15 days was enough to obtain  
120 physiological responses (O'Neill, 1983; Gulen et al., 2018). However, it has been also shown that  
121 a progressive increase in the level of stress may be valuable to detect additional changes in water  
122 relations and chlorophyll fluorescence (Liu et al., 2007; Razavi et al., 2008). Thus, WD treatments  
123 had 50% VWC during the first 15 days and, subsequently, the water supply was suspended until  
124 reaching 25% VWC, which was maintained until the end of the experiment (74 days after planting),

125 using water content measurements as described below.

126

### 127 ***Substrate Volumetric Water Content and Leaf Water Status***

128 The substrate volumetric water content (SVWC) was measured daily between 9:00 and 10:00 am  
129 with a portable soil moisture sensor (ThetaProbe ML2x, Delta-T Devices, Cambridge, UK) at 10  
130 cm depth. The SVWC is the ratio between the volume of water present and the total volume of the  
131 sample, and it is expressed as  $\text{m}^3 \cdot \text{m}^{-3}$ . The Leaf water potential ( $\Psi_{lw}$ ) was measured in the first  
132 completely expanded leaf of the upper third of the plants at 5, 10, 17, and 24 days after treatment  
133 (DAT) at midday with a Scholander pressure chamber (PMS Instruments Model 615, CA, USA).

134

### 135 ***Leaf Gas Exchange, Photosynthetic rate, and Water Use Efficiency***

136 The gas exchange parameters were measured in the first completely expanded leaf of the upper  
137 third of the plants at 5, 10, 17, and 24 days after treatment (DAT). Net photosynthetic rate ( $P_n$ ),  
138 stomatal conductance ( $g_s$ ), and intercellular  $\text{CO}_2$  concentration ( $C_i$ ) were registered using a  
139 photosynthesis measurement system LI-6200 (LI-COR Inc., Biosciences, USA) from 9:00 to 11:30  
140 am with natural light ( $428.46 - 476.07 \mu\text{mol m}^{-2} \text{s}^{-1}$ ) and a  $\text{CO}_2$  concentration of 380 to 400  $\mu\text{L L}^{-1}$ .  
141 The intrinsic water use efficiency ( $\text{WUE}_i$ ) was calculated as the ratio of photosynthetic rate and  
142 stomatal conductance.

143

### 144 ***Relative chlorophyll content (SPAD)***

145 The relative chlorophyll content (SPAD values) was determined using a portable chlorophyll  
146 SPAD-502 (Konica Minolta, Sakai, Osaka, Japan) making 10 measurements on the same leaves  
147 that were used to measure photosynthetic rate.

148

### 149 ***Chlorophyll a Fluorescence***

150 Photosystem II photochemical efficiency ( $F_v/F_m$ ) was measured in dark-adapted leaves for 30 min  
151 using a MINI-PAM modulated fluorometer (Walz<sup>®</sup>, GmbH Effeltrich, Germany); this  
152 measurement was performed on the same leaves used to measure photosynthetic rate. The  
153 measurements were done at a steady state of  $2,000 \mu\text{mol m}^{-2} \text{s}^{-1}$  and a saturating state of  $5,000 \mu\text{mol}$   
154  $\text{m}^{-2} \text{s}^{-1}$  of actinic light for 0.80 s.

155

## 156 ***Membrane Permeability***

157 Cell membrane permeability in leaves was evaluated by electrolyte leakage (EL) according to  
158 Gulen and Eris (2004). Ten 5-mm-diameter leaf discs were placed in Falcon tubes with 10 mL of  
159 deionized water at 16 °C. The electrical conductivity (EC) was determined with a conductometer  
160 (HI 9835 Hanna®, Spain). Electrolyte leakage values were expressed as a percentage in relation to  
161 the highest value using the equation  $EL = (EC_1/EC_2)*100$ , where  $EC_1 = EC$  at 4 h, and  $EC_2 = EC$   
162 after heating for 15 min at 90 °C.

163

## 164 ***Specific Leaf Area and Dry Mass Distribution***

165 To determine the leaf area (LA) of each plant, the non-destructive estimation method was employed  
166 according to Grijalba et al. (2015), who utilized the following equation in strawberry cv. Albion:  $y$   
167  $= 0.8316X^{1.9784}$ , where  $y$  is the area of the leaflet (cm<sup>2</sup>) and  $X$  is the length (cm) of each leaflet  
168 measured from its base to the apex at the central rib. From the sum of individual leaflet areas, the  
169 total leaf area of each plant was obtained. Each plant was separated into roots, leaves, and crown  
170 at the end of the experiment (24 DAT) and the plant material was dried at 65 °C until reaching a  
171 constant weight. Total dry weight and dry weights of the roots, shoots, crown, and leaves were  
172 determined, where the shoot corresponded to crown plus leaves. The specific leaf area was  
173 determined as the ratio of fresh-leaf area/dry mass.

174

## 175 ***Statistical Analysis***

176 The experiment consisted of a full factorial experiment with two factors (Shading and water  
177 deficit), two levels per factor, and four treatments (combinations between the levels of each factor)  
178 as detailed above. A two-way ANOVA was carried out to determine the effects of the individual  
179 factors and treatments on the analyzed variables. The data are presented for factors and their  
180 combinations. Mean comparisons were done with a Tukey's multiple range test ( $p < 0.05$ , 0.01, and  
181 0.001). The statistical analysis was made using the software SAS v. 9.4 (Statistical Analysis  
182 System, USA).

183

## 184 ***Results and Discussion***

185 The water deficit affected all physiological variables except  $C_i$ , SPAD values, SLA, RDW, and  
186 CDW, while the shading affected all variables except  $C_i$  and SLA (Table 1). Significant interactions

187 between factors (water deficit and shading) were found for  $\Psi_{lw}$ ,  $g_s$ ,  $P_n$ ,  $WUE_i$ ,  $F_v/F_m$ , EL, SLA, RDW,  
188 SDW, CDW, LDW, and TDW and are described below.

189

### 190 ***Substrate Volumetric Water Content and Leaf Water Status***

191 Water shortage during 24 DAT negatively affected water status in strawberry plants (Figure 1).  
192 The VWC in the WW plants varied between 0.43 and 0.40 m<sup>3</sup> m<sup>-3</sup>. For the WD plants, the VWC  
193 was 0.22–0.21 m<sup>3</sup> m<sup>-3</sup> (50% SVWC) until 15 DAT and decreased to 0.13–0.10 m<sup>3</sup> m<sup>-3</sup> (25%  
194 SVWC) at 20 DAT, maintaining these values up to the end of the experiment (Figure 1a).

195 The individual factors (water deficit and shading) and the combination of these two factors had a  
196 significant effect on leaf water potential ( $\Psi_{lw}$ ) in strawberry plants (Table 1). In the NS-WD  
197 treatment,  $\Psi_{lw}$  was significantly lower (-2.21 MPa) than that observed in the NS-WW plants (-1.53  
198 MPa; Figure 1b). A decrease in  $\Psi_{lw}$  under water deficit has been reported as one of the main effects  
199 of this stress in strawberry (Klamkowski and Treder, 2008; Grant et al., 2010, 2012). The decrease  
200 in  $\Psi_{lw}$  could be an acclimatization response to cope with adverse conditions and an indirect measure  
201 of the severity of stress (Holmgren et al., 2012). Reduced  $\Psi_{lw}$  values might be a consequence of  
202 reduced osmotic potential, which is caused by the synthesis of compatible solutes facilitating water  
203 absorption during abiotic stress (Hasegawa et al., 2000). To counteract water deficit, strawberry  
204 plants employ osmotic adjustment, increase cell membrane stability, increase leaf thickness, and  
205 improve water use efficiency (Grant et al., 2010, 2012).

206 No significant differences in  $\Psi_{lw}$  were found between the S-WW and the S-WD plants compared  
207 to the NS-WW plants (Figure 1b). These data indicate that the shading had a positive effect on the  
208 water status of water-stressed plants by avoiding reduction in  $\Psi_{lw}$  despite the water limitation  
209 (Figure 1b). Awang and Atherton (1994) and Ma et al. (2015) reported for strawberry and other  
210 plants belonging to the Rosaceae family that shading increased  $\Psi_{lw}$  in well-watered plants and those  
211 subjected to abiotic stress (water deficit or salinity), which, in turn, allowed a greater tolerance to  
212 the adverse effects of stress.

213

### 214 ***Leaf Gas Exchange, Photosynthetic rate and Water Use Efficiency***

215 The shading had a significant effect on  $g_s$ , being significantly lower in the shaded plants (0.30 mol  
216 m<sup>-2</sup> s<sup>-1</sup>) than in the non-shaded plants (0.36 mol m<sup>-2</sup> s<sup>-1</sup>), independently of water availability (Table  
217 1). Regarding the water deficit factor, the  $g_s$  was significantly reduced from 0.509 mol m<sup>-2</sup> s<sup>-1</sup> in

218 the WW plants to  $0.155 \text{ mol m}^{-2} \text{ s}^{-1}$  in the WD plants. As a result of the interaction of factors (Figure  
219 2a), the  $g_s$  was significantly lower in the NS-WD, S-WW, and S-WD treatments with respect to the  
220 NS-WW (control), with the lowest values observed in the WD plants ( $0.17$  and  $0.14 \text{ mol m}^{-2} \text{ s}^{-1}$  in  
221 the NS and S treatments, respectively).

222 Reductions in  $g_s$  in response to shading have been reported for various species, including  
223 strawberry (Whitehead and Teskey, 1995; Gross et al., 1996; Choi et al., 2016; Gerardin et al.,  
224 2018). In shaded tobacco plants, Gerardin et al. (2018) attributed the reduced  $g_s$  values to signaling  
225 mediated by the intercellular  $\text{CO}_2$  ( $C_i$ ) to optimize the concentration of  $\text{CO}_2$  in leaves. In this regard,  
226 Mott (1988) indicated that, in the dark, the stomata of wheat did not respond to free  $\text{CO}_2$   
227 concentration and their opening depended on  $C_i$ . Despite the reduction in  $g_s$  caused by both water  
228 deficit and shading, the  $C_i$  in strawberry leaves remained around  $368 \text{ } \mu\text{mol mol}^{-1}$ , with no  
229 significant differences among the treatments (Table 1). Thus, the reduction in  $g_s$  (Figure 2a) can be  
230 attributed to the effect of light intensity on stomata functioning. This relationship between the light  
231 intensity and stomatal density was established in wild strawberry (Jurik et al., 1982) and herbaceous  
232 plants, such as spinach (Nguyen et al., 2019). On the other hand, the S plants had a significantly  
233 higher leaf area ( $304.89 \pm 42.33 \text{ cm}^2$ ) than the NS plants ( $227.60 \pm 35.81 \text{ cm}^2$ ; Table 1), which  
234 might have affected stomatal density (Onwueme and Johnston, 2000; Qiu et al., 2018); low  
235 stomatal density in the S plants might have had a further effect on the  $g_s$ .

236 The reduction in  $g_s$  observed in the WD plants is a response that has previously been observed in  
237 many species as a strategy to prevent water loss through transpiration (Blanke and Cooke, 2004;  
238 Klamkowski and Treder, 2006). Furthermore, in strawberry plants grown under water deficit or  
239 waterlogging, a decrease in  $g_s$  was observed without a reduction in  $C_i$  (Blanke and Cooke, 2004;  
240 Klamkowski and Treder, 2006) as reported here. This response can be attributed to the direct effects  
241 of water stress on non-stomatal components of photosynthesis (Yordanov et al., 2000).

242 Shading and water availability had a significant effect on  $P_n$ , being significantly lower in the WD  
243 and NS plants (Table 1). In the interaction of factors, significantly lower  $P_n$  values were observed  
244 in the NS-WD plants ( $2.45 \text{ } \mu\text{mol m}^{-2} \text{ s}^{-1}$ ) with respect to the NS-WW plants ( $9.14 \text{ } \mu\text{mol m}^{-2} \text{ s}^{-1}$ ).  
245 The S-WD plants did not show significant differences in  $P_n$  with the S-WW ( $11.57 \text{ } \mu\text{mol m}^{-2} \text{ s}^{-1}$ )  
246 and NS-WW ( $9.14 \text{ } \mu\text{mol m}^{-2} \text{ s}^{-1}$ ) treatments. This indicates that shading allowed the WD plants to  
247 maintain a photosynthetic activity equal to that of the WW plants (Figure 2b) despite a significant  
248 reduction in  $g_s$  in the WD-S as discussed above. The changes in microclimate might have a



249 photoprotective effect on plants by decreasing PAR and air temperature and increasing relative  
250 humidity, thus, attenuating the negative effects of water deficit (Li et al., 2014; Ahemd et al., 2016).  
251 This could explain the significantly higher values of  $P_n$  observed in the S-WD plants as compared  
252 to the NS-WD plants. In some strawberry varieties, low light intensity produced a reduction in  
253 yield and fruit quality; however, 40% shading levels did not significantly reduce plant growth or  
254 net photosynthesis (Choi et al., 2014). Our results indicated that shading at 47% did not represent  
255 a limitation for plant growth. On the contrary, this level of shading could likely reduce the effects  
256 of water deficit on  $P_n$  during vegetative growth by avoiding photoinhibition.

257 The intrinsic water use efficiency ( $WUE_i$ ) could be indicative of plant adaptation to water-limited  
258 environments (Medrano et al., 2015). The  $WUE_i$  was significantly higher in the S-WD plants  
259 ( $86.90 \mu\text{mol CO}_2/\text{mol H}_2\text{O}$ ) than in the other treatments ( $14.8 - 24.8 \mu\text{mol CO}_2/\text{mol H}_2\text{O}$ ; Figure  
260 2c). In strawberry plants grown under water deficit, an increase in  $WUE_i$  was previously found as  
261 part of plant responses to contend the water deficit (Grant et al., 2015).

262 The increase in  $WUE_i$  in the S-WD plants was because  $P_n$  did not decrease, in comparison to the  
263 NS-WD plants, despite the low  $g_s$  and similar  $C_i$  in both treatments (Table 1; Figure 2). In turn, this  
264 may be due to the non-stomatal limitations in the NS-WD plants since high solar radiation under  
265 water deficit can cause an imbalance between electron excitation and use in photosynthesis,  
266 resulting in photoinhibition (Choi et al., 2016). Moreover, a strong relationship exists between  $^{13}\text{C}$   
267 isotope discrimination and  $WUE_i$  (Kumar and Singh, 2009). Grant et al. (2009) reported that  
268 strawberry plants with a low water deficit had a higher  $^{13}\text{C}/^{12}\text{C}$  ratio associated with a higher  $WUE_i$   
269 and increased rate of photosynthesis. In our study, a lower  $g_s$ , a statistically similar  $C_i$ , and the  
270 higher  $P_n$  and  $WUE_i$  in the S-WD plants may be due to lower discrimination of  $^{13}\text{C}$ , which added  
271 to the effect of shading, might have allowed maintaining the photosynthetic activity of the S-WD  
272 plants. However, subsequent studies assessing discrimination of  $^{13}\text{C}$  under these conditions are  
273 necessary to verify this assumption.

#### 274 ***Relative chlorophyll content (SPAD)***

275 The S plants had higher SPAD values ( $47.80 - 48.30$ ) compared to the NS plants ( $41.00 - 43.30$ ),  
276 without the influence of the water availability (Table 1; Figure 3a). The increase in SPAD values  
277 might have contributed to maintaining a high  $P_n$  in the S-WD plants (Figure 2b) due to a better  
278 absorbance of incident radiation (Zhang et al., 2015). Similar results were reported in various

279 species subjected to shading, including strawberry (Mauro et al., 2011; Luo et al., 2012; Russo and  
280 Honermeier, 2017). At the same time, Roiloa and Retuerto (2007) reported reduced levels of  
281 chlorophyll in leaves of *Fragaria vesca* grown under low light intensity. In water-deficient plants,  
282 reduced contents of chlorophyll caused by ROS have been found (Roiloa and Retuerto, 2007);  
283 however, this effect was not observed in the present experiment.

284

### 285 ***Chlorophyll a Fluorescence***

286 In the NS-WD plants,  $F_v/F_m$  significantly decreased ( $0.68 \pm 0.03$ ) with respect to the NS-WW  
287 plants ( $0.80 \pm 0.005$ ), while no differences in  $F_v/F_m$  were observed between S-WD and S-WW  
288 plants ( $0.79 \pm 0.009$  vs.  $0.81 \pm 0.003$ ; Figure 3b). Reduced  $F_v/F_m$  values in the NS-WD plants  
289 suggest the presence of non-stomatal limitations caused by the damage of PSII, as reported in other  
290 plants subjected to severe or moderate water deficit (Grant et al., 2010).  $F_v/F_m$  values below 0.79  
291 are commonly reported as indicators of PSII damage by different types of stress in strawberry (Na  
292 et al., 2014; Choi et al., 2016). In this regard, in strawberry plants exposed to abiotic stress such as  
293 high temperature,  $F_v/F_m$  values from 0.72 indicated a lower PSII efficiency and were the main  
294 reason for reduced photosynthetic rates (Kadir and Sidhu, 2006). Similar results were previously  
295 found by Duan et al. (2013) in shaded strawberry plants. In this way, shading might also prevent  
296 photoinhibition in water-deficient strawberry cv. Sweet Ann (Liu et al., 2007; Zeng et al., 2010).  
297 Additionally, Choi et al. (2016) found a negative correlation between  $g_s$  and  $F_v/F_m$  in strawberry  
298 leaves. In the present study, reduced  $g_s$  values in shaded plants might be related to the PSII  
299 efficiency, which allowed the S-WD plants to tolerate stress conditions and maintain their  
300 photosynthetic activity.

301

### 302 ***Membrane Permeability***

303 The EL was significantly affected by shading, water limitation, and the combination of both factors  
304 (Table 1). In the NS-WD plants, the EL (24.5%) was significantly higher compared to the NS-WW  
305 (20.6%), while no differences were observed in EL between the NS-WW, S-WD, and S-WW plants  
306 (Figure 4). Higher EL values in the NS-WD treatment might indicate cell membrane damage due  
307 to a high activity of ROS that caused lipid peroxidation and loss of selective permeability of  
308 membranes (McDonald and Archbold, 1998; Sun et al., 2015). These results suggest that a lower

309 light intensity favored the membrane integrity by decreasing ROS production, attenuating the  
310 effects of water stress on strawberry plants.

311

### 312 ***Specific Leaf Area and Dry Mass Distribution***

313 The water deficit and shading had a significant effect on the accumulation of dry mass in strawberry  
314 plants. For the specific leaf area (SLA), a significant increase was observed only in the NS-WD  
315 treatment (218.5 cm<sup>2</sup> g<sup>-1</sup>) compared to the NS-WW plants (171.2 cm<sup>2</sup> g<sup>-1</sup>), while the other  
316 treatments did not differ in SLA (Figure 5a). The root dry weight (RDW) was higher in the S-WD  
317 plants (2.3 g) with respect to the NS-WW and NS-WD plants (1.2–1.5 g), but without differences  
318 with the S-WW plants (Figure 5b). The shoot dry weight (SDW) was significantly lower in the NS-  
319 WD plants (1.70 g) in comparison to the other treatments (2.70 – 3.10 g) that did not differ in this  
320 variable (Figure 5c). The S-WD plants accumulated the highest crown weight, CDW (1.40 g)  
321 without significant differences with the NS-WW plants, while the S-WW and NS-WD plants had  
322 the lowest values of CDW (0.90–1.0 g) without differences with the NS-WW (1.1 g) (Figure 5d).  
323 The leaf dry weight (LDW) was significantly lower in the NS-WD (0.8 g) as compared to the other  
324 treatments (1.40–1.70 g), which did not differ in this variable (Figure 5e). The highest total dry  
325 weights (TDW) were registered in the S-WW (4.80 g) and S-WD (4.90 g) compared to the NS-  
326 WW (4.20 g); on the contrary, the NS-WD plants had the lowest TDW (2.90 g; Figure 5f).

327 An increase in SLA in the NS-WD plants was apparently related to a reduced leaf thickness and  
328 can be attributed to the reduction in leaf area and an imbalance between assimilation, distribution,  
329 and use of carbon during water deficit (Álvarez et al., 2011). In fact, the WD plants had  
330 significantly less leaf area ( $198.90 \pm 15.11$  cm<sup>2</sup>,  $p < 0.001$ ) compared to the WW plants ( $338.29 \pm$   
331  $29.76$  cm<sup>2</sup>; Table 1) and a reduced  $P_n$  in the NS-WD treatment (Figure 2b). Leaf area reduction is  
332 a typical response to water deficit to reduce transpiration area and is accompanied by reduced  
333 carbon assimilation due to stomatal and non-stomatal limitations. These responses restrict plant  
334 growth and were observed in the lower weight of the NS-WD plants (Figure 5).

335 Another factor that could influence the accumulation of biomass under water stress is the increase  
336 in the use of carbohydrates for maintenance respiration of existing organs, due to the drastic  
337 decrease in photosynthetic rate (Cameron et al., 1999; Sánchez-Blanco et al., 2009). However,  
338 further studies would be necessary to assess the respiration of strawberry plants under water deficit  
339 and shading.

340 In the S-WD plants, shading favored a better carbon balance by maintaining and increasing dry  
341 weight in all organs compared to the NS-WD plants (Figure 5b-d). A higher accumulation of  
342 biomass was related to a greater  $P_n$ ,  $WUE_i$ , and  $F_v/F_m$  in the S-WD, compared with the NS-WD  
343 plants, which indicates attenuation of the effects of water deficit in shaded plants and agrees with  
344 previous reports on the effects of low radiation under stress conditions (Montanaro et al., 2009).  
345 The highest accumulation of photoassimilates in roots and crowns of the S-WD plants (Figure 5b-  
346 d) may represent an advantage for plant establishment under water deficit or during recovery after  
347 a period of water deficit. In strawberry, favorable effects on the development of vegetative and  
348 reproductive buds have been reported depending on the amount and type of carbohydrates  
349 accumulated in crowns (Kirschbaum et al., 2010).

350

### 351 **Conclusions**

352 The reduction of incident light by 47% generated a microclimate that mitigated the effect of  
353 stomatic and non-stomatic limitations in strawberry plants cv. Sweet Ann under water deficit. By  
354 reducing photosynthetically active radiation, shading induced a better water balance and a higher  
355 water use efficiency. Shading improved photosynthetic performance and increased biomass  
356 accumulation in water-deficient plants. In the present study, the use of shading nets has proven to  
357 be an effective alternative to manage water stress during vegetative growth. Future research  
358 assessing its potential and effects during strawberry production would be valuable to incorporate it  
359 as a common practice in this crop.

360

### 361 **Author's contribution**

362 H.A. Cordoba-Novoa, M.M. Pérez-Trujillo, and B.E. Cruz designed and performed the  
363 experiments and analyzed the data. L.P. Moreno, S. Magnitskiy, and N. Flórez guided the research  
364 and provided technical support for designing and conducting the experiments. H.A. Cordoba-  
365 Novoa, S. Magnitskiy, and L.P. Moreno wrote the manuscript. All authors read and approved the  
366 final manuscript.

367

### 368 **References**

369

370 Ahemd, H.A., A.A. Al-Faraj, and A.M. Abdel-Ghany. 2016. Shading greenhouses to improve the

- 371 microclimate, energy and water saving in hot regions: A review. *Sci. Hortic.* 201:36–45. doi:  
372 10.1016/j.scienta.2016.01.030.
- 373 Ahuja, I., R.C.H. de Vos, A.M. Bones, and R.D. Hall. 2010. Plant molecular stress responses face  
374 climate change. *Trends Plant Sci.* 15(12):664–674. doi: 10.1016/j.tplants.2010.08.002.
- 375 Álvarez, S., A. Navarro, E. Nicolás, and M.J. Sánchez-Blanco. 2011. Transpiration, photosynthetic  
376 responses, tissue water relations and dry mass partitioning in callistemon plants during  
377 drought conditions. *Sci. Hortic.* 129(2):306–312. doi: 10.1016/j.scienta.2011.03.031.
- 378 Awang, Y.B., and J.G. Atherton. 1994. Salinity and shading effects on leaf water relations and  
379 ionic composition of strawberry plants grown on rockwool. *J. Hortic. Sci.* 69(2):377–383. doi:  
380 10.1080/14620316.1994.11516467.
- 381 Blanke, M.M., and D.T. Cooke. 2004. Effects of flooding and drought on stomatal activity,  
382 transpiration, photosynthesis, water potential and water channel activity in strawberry stolons  
383 and leaves. *Plant Growth Regul.* 42(2):153–160. doi:  
384 10.1023/B:GROW.0000017489.21970.d4.
- 385 Cameron, R.W.F., R.S. Harrison-Murray, and M.A. Scott. 1999. The use of controlled water stress  
386 to manipulate growth of container-grown rhododendron cv. Hoppy. *J. Hortic. Sci. Biotechnol.*  
387 74(2):161–169. doi: 10.1080/14620316.1999.11511089
- 388 Casierra-Posada, F., J.E. Peña-Olmos, and C. Ulrichs. 2012. Basic growth analysis in strawberry  
389 plants (*Fragaria* sp.) exposed to different radiation environments. *Agron. Colomb.* 30(1):25–  
390 33.
- 391 Choi, Hyo Gil, B.Y. Moon, N.J. Kang, J.K. Kwon, K. Bekhzod, K.S. Park, and S.Y. Lee. 2014.  
392 Yield loss and quality degradation of strawberry fruits cultivated under the deficient insolation  
393 conditions by shading. *Hortic. Environ. Biotechnol.* 55(4):263–270. doi: 10.1007/s13580-  
394 014-0039-0.
- 395 Choi, Hyo G, B.Y. Moon, and N.J. Kang. 2016. Correlation between strawberry (*Fragaria*  
396 ×*ananassa* Duch.) productivity and photosynthesis-related parameters under various growth  
397 conditions. *Front. Plant Sci.* 7:1607. doi: 10.3389/fpls.2016.01607
- 398 Duan, R., M. Huang, Z. Wang, Z. Zhang, and W. Fan. 2013. Effects of shading stress and light  
399 recovery on the photosynthesis characteristic and chlorophyll fluorescence characteristic of  
400 *Fragaria ananassa* Duch. cv. Toyonoka. *Adv. J. Food Sci. Technol.* 5(6):787–792.
- 401 El-Farhan, A., and M. Pritts. 1997. Water requirements and water stress in strawberry. *Adv. in*

- 402 Strawberry Research 16(1):5–12.
- 403 Farooq, M, A. Wahid, N. Kobayashi, D. Fujita, and SMA. Basra. 2009. Plant drought stress:  
404 effects, mechanisms, and management. Agron. Sustain. Dev. 29:185-212. doi:  
405 10.1051/agro:2008021.
- 406 Fierascu, R. C., G. Temocico, I. Fierascu, A. Ortan, and N. E. Babeanu. 2020. *Fragaria* genus:  
407 Chemical composition and biological activities. Molecules. 25(3):498.  
408 doi.org/10.3390/molecules25030498
- 409 Galmés, J., J.M. Ochogavía, J. Gago, E.J. Roldán, J. Cifre, and M.À. Conesa. 2013. Leaf responses  
410 to drought stress in mediterranean accessions of *Solanum lycopersicum*: Anatomical  
411 adaptations in relation to gas exchange parameters. Plant Cell Environ. 36(5):920–935. doi:  
412 10.1111/pce.12022.
- 413 García-Tejero, I.F., D. López-Borrallo, L. Miranda, J.J. Medina, J. Arriaga, J.L. Muriel-Fernández,  
414 and E. Martínez-Ferri. 2018. Estimating strawberry crop coefficients under plastic tunnels in  
415 Southern Spain by using drainage lysimeters. Sci. Hortic. 231:233–240. doi:  
416 10.1016/j.scienta.2017.12.020.
- 417 Gerardin, T., C. Douthe, J. Flexas, and O. Brendel. 2018. Shade and drought growth conditions  
418 strongly impact dynamic responses of stomata to variations in irradiance in *Nicotiana*  
419 *Tabacum*. Environ. Exp. Bot. 153:188-197. doi: 10.1016/j.envexp bot.2018.05.019.
- 420 Ghaderi, N., S. Normohammadi, and T. Javadi. 2015. Morpho-physiological responses of  
421 strawberry (*Fragaria ×ananassa*) to exogenous salicylic acid application under drought  
422 stress. J Agric. Sci. Techol. 17(1):167–178.
- 423 Grant, O., C. James, P. Dodds, and N. Šurbanovski. 2009. Carbon isotope composition indicates  
424 improved photosynthesis water use efficiency of strawberry plant under deficit irrigation.  
425 Acta Hortic. 889:397–402. doi: 10.17660/ActaHortic.2011.889.49.
- 426 Grant, O.M., M.J. Davies, A.W. Johnson, and D.W. Simpson. 2012. Physiological and growth  
427 responses to water deficits in cultivated strawberry (*Fragaria ×ananassa*) and in one of its  
428 progenitors, *Fragaria chiloensis*. Environ. Exp. Bot. 83:23–32. doi:  
429 10.1016/j.envexpbot.2012.04.004.
- 430 Grant, O.M., A.W. Johnson, M.J. Davies, C.M. James, and D.W. Simpson. 2010. Physiological  
431 and morphological diversity of cultivated strawberry (*Fragaria ×ananassa*) in response to  
432 water deficit. Environ. Exp. Bot. 68(3):264–272. doi: 10.1016/j.envexpbot.2010.01.008.

- 433 Grant, O.M., Ł. Tronina, J.I. García-Plazaola, R. Esteban, J.S. Pereira, and M. Manuela Chaves.  
434 2015. Resilience of a semi-deciduous shrub, *Cistus salvifolius*, to severe summer drought and  
435 heat stress. *Funct. Plant Biol.* 42(2):219–228. doi: 10.1071/FP14081.
- 436 Grijalba, C.M., M.M. Pérez-Trujillo, D. Ruiz, and A.M. Ferrucho. 2015. Strawberry yields with  
437 high-tunnel and open-field cultivations and the relationship with vegetative and reproductive  
438 plant characteristics. *Agron. Colomb.* 33(2):147–154.
- 439 Gross, K., A. Homlicher, A. Weinreich, E. Wagner, K. Gross, A. Homlicher, A. Weinreich, and  
440 E.W. Effect. 1996. Effect of shade on stomatal conductance, net photosynthesis,  
441 photochemical efficiency and growth of oak saplings. *Ann. For. Sci.* 53:279–290.
- 442 Gulen, H., and A. Eris. 2004. Effect of heat stress on peroxidase activity and total protein content  
443 in strawberry plants. *Plant Sci.* 166(3):739–744. doi: 10.1016 /j.plantsci.2003.11.014.
- 444 Gulen, H., M. Kesici, C. Cetinkaya, and S. Ergin. 2018. Proline and antioxidant enzyme activities  
445 in some strawberry cultivars under drought and recovery. *Not. Bot. Horti. Agrobot. Cluj.*  
446 *Napoca.* 46(2):570–578. doi: 10.15835/nbha46211077.
- 447 Hasegawa, P.M., R.A. Bressan, J.-K. Zhu, and H. Bohnert. 2000. Plant cellular and molecular  
448 responses to high salinity. *Plant Mol. Biol.* 51(4):63–99. doi: 1040-2519/00/0601-  
449 0463\$14.00.
- 450 Holmgren, M., L. Gómez-Aparicio, J.L. Quero, and F. Valladares. 2012. Non-linear effects of  
451 drought under shade: Reconciling physiological and ecological models in plant communities.  
452 *Oecologia* 169(2):293–305. doi: 10.1007/s00442-011-2196-5.
- 453 Jifon, J.L., and J.P. Syvertsen. 2003. Moderate shade can increase net gas exchange and reduce  
454 photoinhibition in Citrus leaves. *Tree Physiol.* 23(2):119–27. doi: 10.1093/treephys/23.2.119.
- 455 Jurik, T.W., J.F. Chabot, and B.F. Chabot. 1982. Effects of light and nutrients on leaf size, CO<sub>2</sub>  
456 exchange, and anatomy in wild strawberry (*Fragaria virginiana*). *Plant Physiol.* 70(4):1044–  
457 1048. doi: 10.1104/pp.70.4.1044.
- 458 Kadir, S., and G. Sidhu. 2006. Strawberry (*Fragaria ×ananassa* Duch.) growth and productivity  
459 as affected by temperature. *Hort. Science.* 41(6):1423–1430.
- 460 Kirschbaum, D.S., K.D. Larson, S.A. Weinbaum, and T.M. Dejong. 2010. Relationships of  
461 carbohydrate and nitrogen content with strawberry transplant vigor and fruiting pattern in  
462 annual production systems. *Amer. J. Plant Sci. Biotechol.* 4(special issue):98–103.
- 463 Klamkowski, K., and W. Treder. 2006. Morphological and physiological responses of strawberry

- 464 plants to water stress. *Agric. Conspec. Sci.* 71(4):159–165.
- 465 Klamkowski, K., and W. Treder. 2008. Response to drought stress of three strawberry cultivars  
466 grown under greenhouse conditions. *J. Fruit Ornam. Plant Res.* 16:179–188.
- 467 Klamkowski, K., W. Treder, and K. Wójcik. 2015. Effects of long-term water stress on leaf gas  
468 exchange, growth and yield of three strawberry cultivars. *Acta Sci. Pol. Hortorum Cultus*  
469 14(6):55–65.
- 470 Kumar, S., and B. Singh. 2009. Effect of water stress on carbon isotope discrimination and rubisco  
471 activity in bread and durum wheat genotypes. *Physiol. Mol. Biol. Plants.* 15(3):281–286. doi:  
472 10.1007/s12298-009-0032-8.
- 473 Leng, G., and J. Hall. 2019. Crop yield sensitivity of global major agricultural countries to droughts  
474 and the projected changes in the future. *Sci. Total Environ.* 654:811–821. doi:  
475 10.1016/j.scitotenv.2018.10.434.
- 476 Li, T., L.N. Liu, C.D. Jiang, Y.J. Liu, and L. Shi. 2014. Effects of mutual shading on the regulation  
477 of photosynthesis in field-grown sorghum. *J. Photochem. Photobiol. B.* 137:31–38. doi:  
478 10.1016/j.jphotobiol.2014.04.022.
- 479 Liu, F., S. Savić, C.R. Jensen, A. Shahnazari, S.E. Jacobsen, R. Stikić, and M.N. Andersen. 2007.  
480 Water relations and yield of lysimeter-grown strawberries under limited irrigation. *Sci. Hortic.*  
481 111(2):128–132. doi: 10.1016/j.scienta.2006.10.006.
- 482 Luo, H., L. Feng, M. Li, and L. Zhang. 2012. Effects of shading on the chlorophyll fluorescence  
483 parameters of *Fragaria vesca* cv. ‘Selva’ and ‘Midlight. *J. Hebei Agric. Univ.* 35(5):25-28.  
484 doi: 1000-1573(2012)05-0025-04.
- 485 Ma, P., T.H. Bai, X.Q. Wang, and F.W. Ma. 2015. Effects of light intensity on photosynthesis and  
486 photoprotective mechanisms in apple under progressive drought. *J. Integr. Agric.* 14(9):1755–  
487 1766. [http://dx.doi.org/10.1016/S2095-3119\(15\)61148-0](http://dx.doi.org/10.1016/S2095-3119(15)61148-0).
- 488 Martin-StPaul, N., S. Delzon and H. Cochard. 2017. Plant resistance to drought depends on timely  
489 stomatal closure. *Ecol. Letters* 20(11), 1437-1447. doi: 10.1111/ele.12851.
- 490 Martínez-Ferri, E., C. Soria, M.T. Ariza, J.J. Medina, L. Miranda, P. Domínguez, and J.L. Muriel.  
491 2016. Water relations, growth and physiological response of seven strawberry cultivars  
492 (*Fragaria ×ananassa* Duch.) to different water availability. *Agric. Water Manage.* 164:73–  
493 82. doi: 10.1016/j.agwat.2015.08.014.
- 494 Mauro, R.P., A. Occhipinti, A.M.G. Longo, and G. Mauromicale. 2011. Effects of shading on



- 495 chlorophyll content, chlorophyll fluorescence and photosynthesis of subterranean clover. J.  
496 Agron. Crop. Sci. 197(1):57–66. doi: 10.1111/j.1439-037X.2010.00436.x.
- 497 McDonald, S., and D. Archbold. 1998. Membrane competence among and within *Fragaria* species  
498 varies in response to dehydration stress. J. Am. Soc. Hortic. Sci. 123(5):808–813.
- 499 Mditshwa, A., L. Magwaza, and S. Tesfay. 2019. Shade netting on subtropical fruit: effect on  
500 environmental conditions, tree physiology and fruit quality. Sci. Hortic. 256(1):108556. doi:  
501 10.1016/j.scienta.2019.108556.
- 502 Medrano, H., M. Tomás, S. Martorell, J. Flexas, E. Hernández, J. Rosselló, A. Pou, J. Escalona,  
503 and J. Bota. 2015. From leaf to whole-plant water use efficiency (WUE) in complex canopies:  
504 limitations of leaf WUE as a selection target. Crop J. 3(3):220–228. doi:  
505 10.1016/j.cj.2015.04.002.
- 506 Mo, X., S. Hu, Z. Lin, S. Liu, and J. Xia. 2017. Impacts of climate change on agricultural water  
507 resources and adaptation on the north China Plain. Adv. Clim. Chang. 8(2):93–98. doi:  
508 10.1016/j.accre.2017.05.007.
- 509 Montanaro, G., B. Dichio, and C. Xiloyannis. 2009. Shade mitigates photoinhibition and enhances  
510 water use efficiency in kiwifruit under drought. Photosynthetica 47(3):363–371. doi:  
511 10.1007/s11099-009-0057-9.
- 512 Mott, K.A. 1988. Do stomata respond to CO<sub>2</sub> concentrations other than intercellular? Plant Physiol.  
513 86(1):200–203. doi: 10.1104/pp.86.1.200.
- 514 Munné-Bosch, S., and J. Peñuelas. 2004. Drought-induced oxidative stress in strawberry tree  
515 (*Arbutus unedo* L.) growing in Mediterranean field conditions. Plant Sci. 166(4):1105–1110.  
516 doi: 10.1016/j.plantsci.2003.12.034.
- 517 Na, Y., H.J. Jeong, S. Lee, H.G. Choi, S. Kim, and I.R. Rho. 2014. Wild and cultivated strawberry  
518 species chlorophyll fluorescence as a diagnostic tool for abiotic stress tolerance in wild and  
519 cultivated strawberry species. Hortic. Environ. Biotechnol. 55(4):280–286. doi:  
520 10.1007/s13580-014-0006-9.
- 521 Neri, D., G. Baruzzi, F. Massetani, and W. Faedi. 2012. Strawberry production in forced and  
522 protected culture in Europe as a response to climate change. Can. J. Plant Sci. 92(6):1021–  
523 1036. doi: 10.4141/CJPS2011-276.
- 524 Nguyen, T.P.D., T.T.H. Tran, and Q.T. Nguyen. 2019. Effects of light intensity on the growth,  
525 photosynthesis and leaf microstructure of hydroponic cultivated spinach (*Spinacia oleracea*

- 526 l.) under a combination of red and blue LEDs in house. *Int. J. Agric. Technol.* 15(1):75–90.
- 527 Nicolás, E., A. Torrecillas, J. Dell Amico, and J.J. Alarcón. 2005. Sap flow, gas exchange, and  
528 hydraulic conductance of young apricot trees growing under a shading net and different water  
529 supplies. *J. Plant Physiol.* 162(4):439–447. doi: 10.1016/j.jplph.2004.05.014.
- 530 O’Neill, S.D. 1983. Role of osmotic potential gradients during water stress and leaf senescence in  
531 *Fragaria virginiana*. *Plant Physiol.* 72, no. 4: 931–937. doi: 10.1104/pp.72.4.931.
- 532 OECD. 2014. Climate change, water and agriculture: towards resilient systems. OECD Studies on  
533 water. OECD Publishing. doi: 10.1787/9789264209138-en.
- 534 Onwueme, I.C., and M. Johnston. 2000. Influence of shade on stomatal density, leaf size and other  
535 leaf characteristics in the major tropical root crops, tannia, sweet potato, yam, cassava and  
536 taro. *Exp. Agric.* 36(4):509–516. doi: 10.1017/S0014479700001071.
- 537 Osakabe, Y., K. Osakabe, K. Shinozaki, and L.-S.P. Tran. 2014. Response of plants to water. *Front.*  
538 *Plant Sci.* 5:86. doi: 10.3389/fpls.2014.00086/abstract.
- 539 Qiu, T., Y. Wu, Z. Shen, Y. Wu, D. Lu, and J. He. 2018. Effects of shading on leaf physiology and  
540 morphology in the “Yinhong” grape plants. *Rev. Bras. Frutic.* 40(5):1–10. doi: 10.1590/0100-  
541 29452018037.
- 542 Razavi, F., B. Pollet, K. Steppe, and M.C. Van Labeke. 2008. Chlorophyll fluorescence as a tool  
543 for evaluation of drought stress in strawberry. *Photosynthetica* 46(4): 631–633. doi:  
544 10.1007/s11099-008-0108-7.
- 545 Roiloa, S.R. and R. Rutuerto. 2007. Responses of the clonal *Fragaria vesca* to microtopographic  
546 heterogeneity under different water and light conditions. *Environ. Exp. Bot.* 61:1–9. doi:  
547 10.1016/j.envexpbot.2007.02.006.
- 548 Russo, M., and B. Honermeier. 2017. Effect of shading on leaf yield, plant parameters, and  
549 essential oil content of lemon balm (*Melissa officinalis* L.). *J. Appl. Res. Med. Aromat. Plants.*  
550 7:27–34. doi: 10.1016/j.jarmap.2017.04.003.
- 551 Sánchez-Blanco, M.J., S. Álvarez, A. Navarro, and S. Bañón. 2009. Changes in leaf water relations,  
552 gas exchange, growth and flowering quality in potted geranium plants irrigated with different  
553 water regimes. *J. Plant Physiol.* 166(5):467–476. doi: 10.1016/j.jplph.2008.06.015.
- 554 Sofó, A., B. Dichio, G. Montanaro, and C. Xiloyannis. 2009. Shade effect on photosynthesis and  
555 photoinhibition in olive during drought and rewatering. *Agric. Water Manage.* 96(8):1201–  
556 1206. doi: 10.1016/j.agwat.2009.03.004.

- 557 Sun, C.H., X.H. Li, Y.L. Hu, P. Zhao, T. Xu, J. Sun, and X.L. Gao. 2015. Proline, sugars, and  
558 antioxidant enzymes respond to drought stress in the leaves of strawberry plants. *Korean J.*  
559 *Hortic. Sci. Technol.* 33(5):625–632. doi: 10.7235/hort.2015.15054.
- 560 Tabatabaei, S.J., M. Yusefi, and J. Hajiloo. 2008. Effects of shading and no<sub>3</sub>:nh<sub>4</sub> ratio on the yield,  
561 quality and N metabolism in strawberry. *Sci. Hortic.* 116(3):264–272. doi:  
562 10.1016/j.scienta.2007.12.008.
- 563 Tagliavini, M., E. Baldi, P. Lucchi, M. Antonelli, G. Sorrenti, G. Baruzzi, and W. Faedi. 2005.  
564 Dynamics of nutrients uptake by strawberry plants (*Fragaria ×ananassa* Dutch.) grown in  
565 soil and soilless culture. *Europ. J. Agron.* 23:5–25. doi:10.1016/j.eja.2004.09.002.
- 566 Whitehead, D., and R.O. Teskey. 1995. Dynamic response of stomata to changing irradiance in  
567 loblolly pine (*Pinus taeda* L.). *Tree Physiol.* 15:245–251.
- 568 Yordanov, I.T., V. Velikova, and T. Tsonev. 2000. Plant responses to drought and stress.  
569 *Photosynthetica* 38(1):171–186.
- 570 Zeng, X., X. Feng, F. Xiang, Z. Song, J. Wu, R. Wu, and Y. Gu. 2010. Effects of shading on  
571 photosynthesis of strawberry. *J. Hebei Agric. Univ.* 49(11) :2811-2814. doi :  
572 10.14088/j.cnki.issn0439-8114.2010.11.054.
- 573 Zhao, J., J. Jun Zhou, Y. Ying Wang, J. Wei Gu, and X. Zhi Xie. 2013. Positive regulation of  
574 phytochrome b on chlorophyll biosynthesis and chloroplast development in rice. *Rice Sci.*  
575 20(4):243–248. doi: 10.1016/S1672-6308(13)60133-X.
- 576
- 577

578 **Table 1.** Analysis of variance (ANOVA) for physiological variables of leaf water potential ( $\Psi_{lw}$ ), stomatal conductance ( $g_s$ ), intracellular  
579 CO<sub>2</sub> concentration ( $C_i$ ), photosynthetic rate ( $Pn$ ), intrinsic water use efficiency (WUE<sub>i</sub>), SPAD values, photosystem II  
580 photochemical efficiency ( $F_v/F_m$ ), electrolyte leakage percentage (EL), leaf area (LA), specific leaf area (SLA), shoot dry weight  
581 (SDW), root dry weight (RDW), crown dry weight (CDW), leaf dry weight (LDW), and total dry weight (TDW) of strawberry  
582 plants cv. Sweet Ann under shading and water deficit. Averages and significance are shown for each level and factor.  
583

| Source of variation | $\Psi_{lw}$<br>(Mpa) | $g_s$<br>(mol m <sup>-2</sup> s <sup>-1</sup> ) | $C_i$<br>( $\mu$ mol mol <sup>-1</sup> ) | $Pn$<br>( $\mu$ mol m <sup>-2</sup> s <sup>-1</sup> ) | WUE <sub>i</sub><br>( $\mu$ mol<br>CO <sub>2</sub> /mol H <sub>2</sub> O) | SPAD<br>values | $F_v/F_m$ | EL (%) | LA<br>(cm <sup>2</sup> ) | SLA<br>(cm <sup>2</sup> g <sup>-1</sup> ) | RDW (g) | SDW (g) | CDW (g) | LDW (g) | TDW (g) |
|---------------------|----------------------|-------------------------------------------------|------------------------------------------|-------------------------------------------------------|---------------------------------------------------------------------------|----------------|-----------|--------|--------------------------|-------------------------------------------|---------|---------|---------|---------|---------|
| Well watered        | -1.41                | 0.51                                            | 368.74                                   | 10.52                                                 | 21.15                                                                     | 45.79          | 0.80      | 21.13  | 338.29                   | 186.86                                    | 1.60    | 2.90    | 1.06    | 1.65    | 4.58    |
| Water deficit       | -1.85                | 0.16                                            | 367.81                                   | 5.94                                                  | 50.89                                                                     | 44.36          | 0.74      | 22.95  | 198.96                   | 203.29                                    | 1.74    | 2.20    | 1.16    | 1.11    | 3.88    |
| Non-shaded          | -1.87                | 0.36                                            | 368.06                                   | 5.79                                                  | 15.56                                                                     | 42.10          | 0.74      | 22.29  | 227.60                   | 191.47                                    | 1.37    | 2.21    | 1.01    | 1.27    | 3.68    |
| Shaded              | -1.39                | 0.30                                            | 368.49                                   | 10.65                                                 | 51.44                                                                     | 48.05          | 0.80      | 21.53  | 304.89                   | 198.69                                    | 1.96    | 3.00    | 1.20    | 1.55    | 4.88    |
| ANOVA               |                      |                                                 |                                          |                                                       |                                                                           |                |           |        |                          |                                           |         |         |         |         |         |
| Water deficit (WD)  | ***                  | ***                                             | n.s.                                     | ***                                                   | ***                                                                       | n.s.           | ***       | **     | ***                      | n.s.                                      | n.s.    | ***     | n.s.    | ***     | ***     |
| Shading (S)         | ***                  | ***                                             | n.s.                                     | ***                                                   | ***                                                                       | ***            | ***       | *      | **                       | n.s.                                      | *       | ***     | *       | **      | ***     |
| WD x S              | **                   | **                                              | n.s.                                     | **                                                    | **                                                                        | n.s.           | **        | **     | n.s.                     | **                                        | **      | **      | **      | *       | ***     |

584

585

586 ANOVA: \*, \*\*, and \*\*\* significantly different at the 0.05, 0.01 and 0.001 probability levels, respectively, according to the Tukey's test.

587 n.s., not significant at  $p \leq 0.05$ .

588

589

590

591

592

593

594

595

596

597

598

599

600

601

602

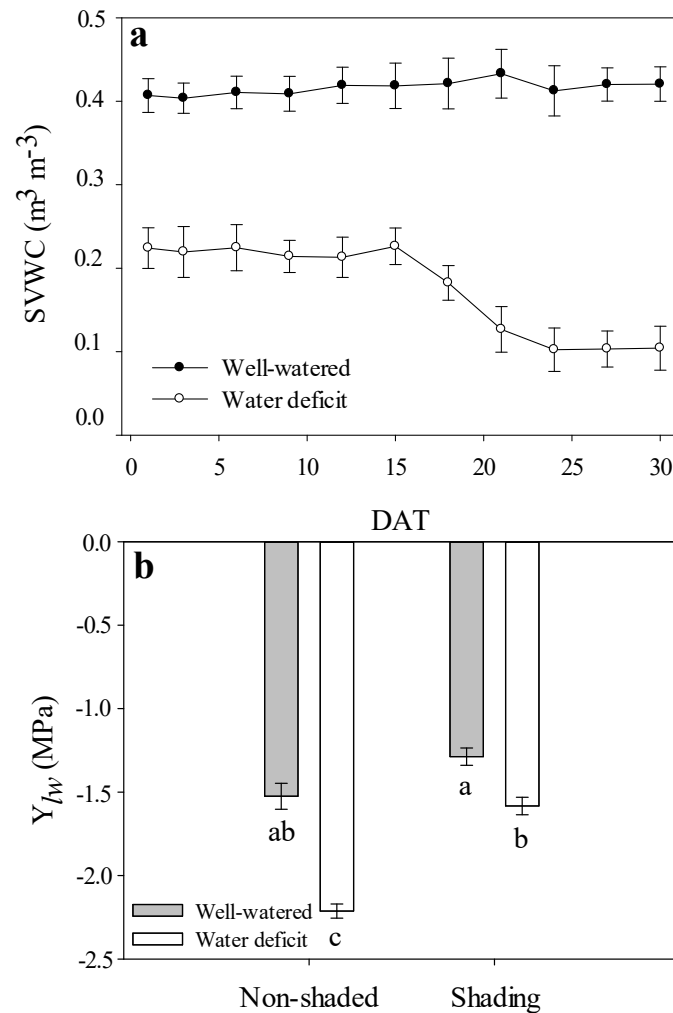

603  
604 **Figure 1.** Substrate volumetric water content (SVWC) during 0-30 DAT (a) and leaf water  
605 potential ( $\Psi_{lw}$ ) at 24 DAT (b) of 'Sweet Ann' strawberry plants grown under non-shaded and  
606 shading conditions. DAT: days after treatment. Values are the means of four replicates, with error  
607 bars representing the standard error. Means denoted by the same letter do not significantly differ  
608 at  $p \leq 0.01$  according to the Tukey's test.

609

610

611

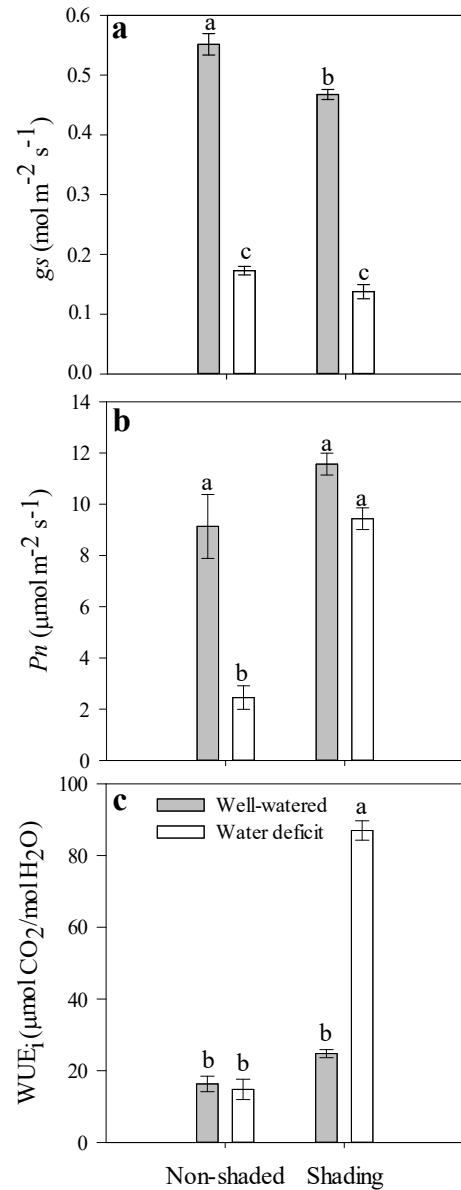

612

613 **Figure 2.** Stomatal conductance ( $g_s$ ) (a), net photosynthesis rate ( $P_n$ ) (b) and intrinsic water-use  
614 efficiency ( $WUE_i$ ) (c) at 24 DAT of 'Sweet Ann' strawberry plants grown under non-shaded and  
615 shading conditions. DAT: days after treatment. Values are the means of four replicates, with error  
616 bars representing the standard error. Means denoted by the same letter do not significantly differ  
617 at  $p \leq 0.01$  according to the Tukey's test.

618

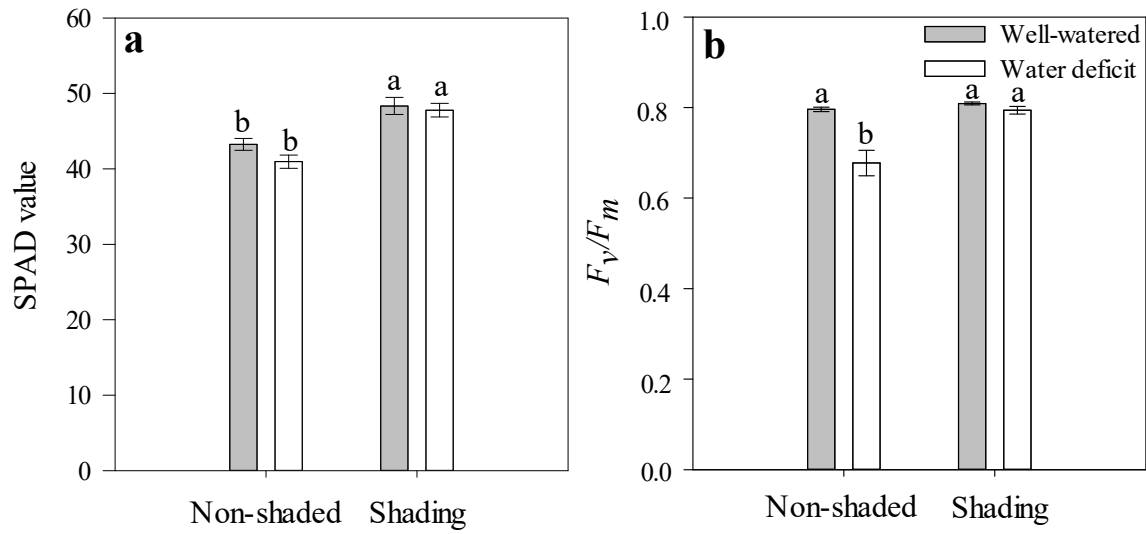

619

620 **Figure 3.** SPAD values (a) and photosystem II photochemical efficiency ( $F_v/F_m$ ) (b) at 24 DAT of  
621 'Sweet Ann' strawberry plants grown under non-shaded and shading conditions. DAT: days after  
622 treatment. Values are the means of four replicates, with error bars representing the standard error.  
623 Means denoted by the same letter do not significantly differ at  $p \leq 0.01$  according to the Tukey's  
624 test.

625

626

627

628

629

630

631

632

633



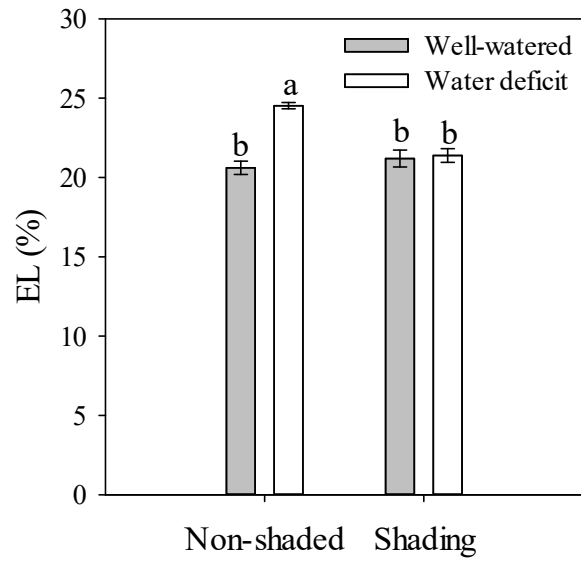

634

635 **Figure 4.** Electrolyte leakage (EL) at 24 DAT of ‘Sweet Ann’ strawberry plants grown under non-  
636 shaded and shading conditions. DAT: days after treatment. Values are the means of four replicates,  
637 with error bars representing the standard error. Means denoted by the same letter do not  
638 significantly differ at  $p \leq 0.01$  according to the Tukey’s test.

639

640

641

642

643

644

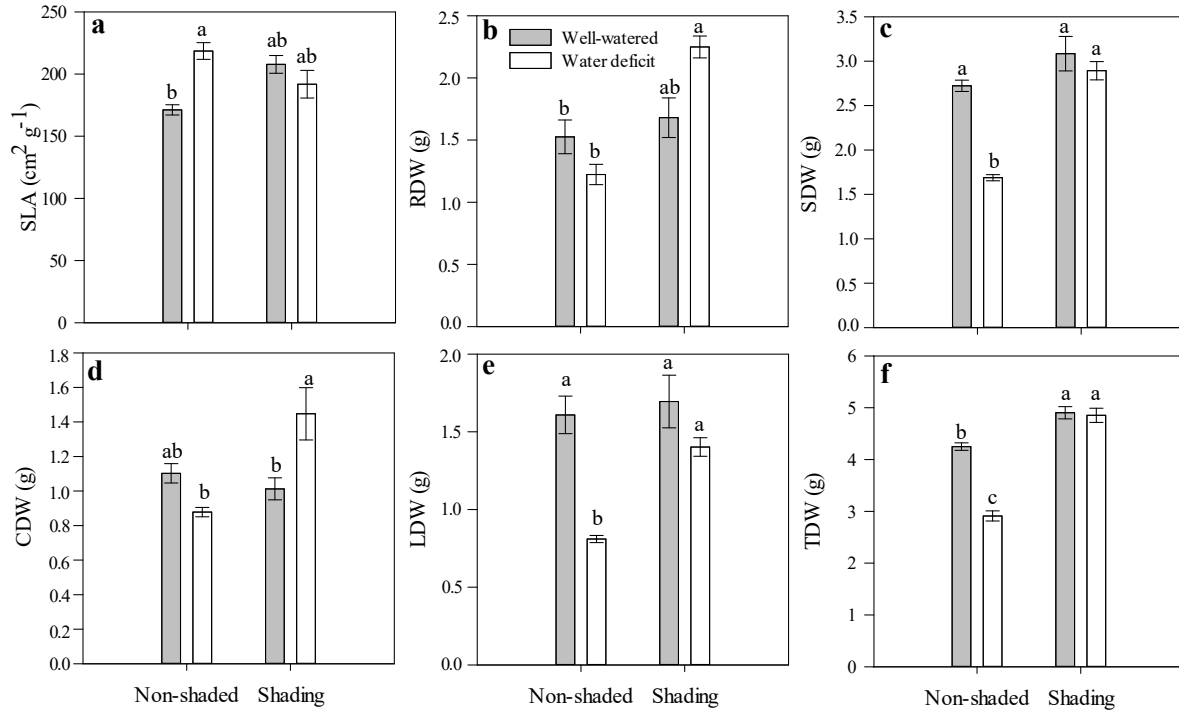

645  
646 **Figure 5.** Specific leaf area (SLA) (a), root dry weight (RDW) (b), shoot dry weight (SDW) (c),  
647 crown dry weight (CDW) (d), leaves dry weight (LDW) (e), and total dry weight (TDW) (f) at 24  
648 DAT of 'Sweet Ann' strawberry plants grown under non-shaded and shading conditions. DAT:  
649 days after treatment. Values are the means of four replicates, with error bars representing the  
650 standard error. Means denoted by the same letter do not significantly differ at  $P \leq 0.01$  according  
651 to the Tukey's test. For LDW differences are given at  $p \leq 0.05$ .
